# Supplementary material for: The highly sensitive determination of serotonin by using gold nanoparticles (Au NPs) with a localized surface plasmon resonance (LSPR) absorption wavelength in the visible region
Source: RSC Adv. 2020 Aug 20;10(51):30858–69. doi: 10.1039/d0ra05271j (PMC9056339; doi:10.1039/d0ra05271j)
Supplement: RA-010-D0RA05271J-s001 [file RA-010-D0RA05271J-s001.pdf]

## Supplementary Material

For

### Highly sensitive determination of serotonin by using gold nanoparticles (Au NPs) with localized surface plasmon resonance (LSPR) absorption wavelength a visible region

Phuong Que Tran Do,<sup>‡a,b</sup> Vu Thi Huong,<sup>‡a,b</sup> Nguyen Tran Truc Phuong,<sup>a,b</sup> Thi-Hiep Nguyen,<sup>b,c</sup> Hanh Kieu Thi Ta,<sup>a,b</sup> Heongkyu Ju,<sup>d</sup> Thang Bach Phan,<sup>b,e,f</sup> Viet-Duc Phung,<sup>g,h</sup> Kieu The Loan Trinh<sup>i</sup> and Nhu Hoa Thi Tran<sup>\*a,b</sup>

<sup>a.</sup> *Faculty of Materials Science and Technology, University of Science, HoChiMinh City, Viet Nam*

<sup>b.</sup> *Vietnam National University, HoChiMinh City, Viet Nam*

<sup>c.</sup> *Tissue Engineering and Regenerative Medicine Laboratory, Department of Biomedical Engineering, International University, HoChiMinh City, Viet Nam*

<sup>d.</sup> *Department of Nano-Physics, Gachon University, Seongnam-si, Gyeonggi-do 13120, Republic of Korea*

<sup>e.</sup> *Center for Innovative Materials and Architectures (INOMAR), HoChiMinh City, Viet Nam*

<sup>f.</sup> *Laboratory of Advanced Materials, University of Science, HoChiMinh City, Viet Nam*

<sup>g.</sup> *Future Materials and Devices Laboratory, Institute of Fundamental and Applied Sciences, Duy Tan University, Ho Chi Minh City, 700000, Viet Nam*

<sup>h.</sup> *Faculty of Environmental and Chemical Engineering, Duy Tan University, Da Nang, 550000, Viet Nam*

<sup>i.</sup> *Department of Industrial Environmental Engineering, College of Industrial Environmental Engineering, Gachon University, Seongnam-si, Gyeonggi-do 13120, Republic of Korea*

<sup>‡</sup>P.Q.T.D. and V.T.H. contributed equally to this work.

\*Corresponding author: [ttnhoa@hcmus.edu.vn](mailto:ttnhoa@hcmus.edu.vn)

The concentration of 5-HT, dopamine, and ascorbic acid were  $10^{-7}$  M. This sample was absorbed on our SERS substrate and measured by Raman spectroscopy. The result was shown in Fig. 1S. The spectrum of 5-HT ( $10^{-7}$  M) was inserted for the comparison. As shown in this figure, the peaks of 5-HT were slightly shifted to 754, 833, 946, 1202, 1308, 1350, 1440, and  $1547\text{ cm}^{-1}$ . The additional peaks at 1370, 1479,  $1622\text{ cm}^{-1}$  were belonged to dopamine.<sup>80</sup> There was no peak of ascorbic acid because it was nonaffinitiy for Au.<sup>81</sup> In general, 5-HT can be detected by our SERS substrate in complex mixture.

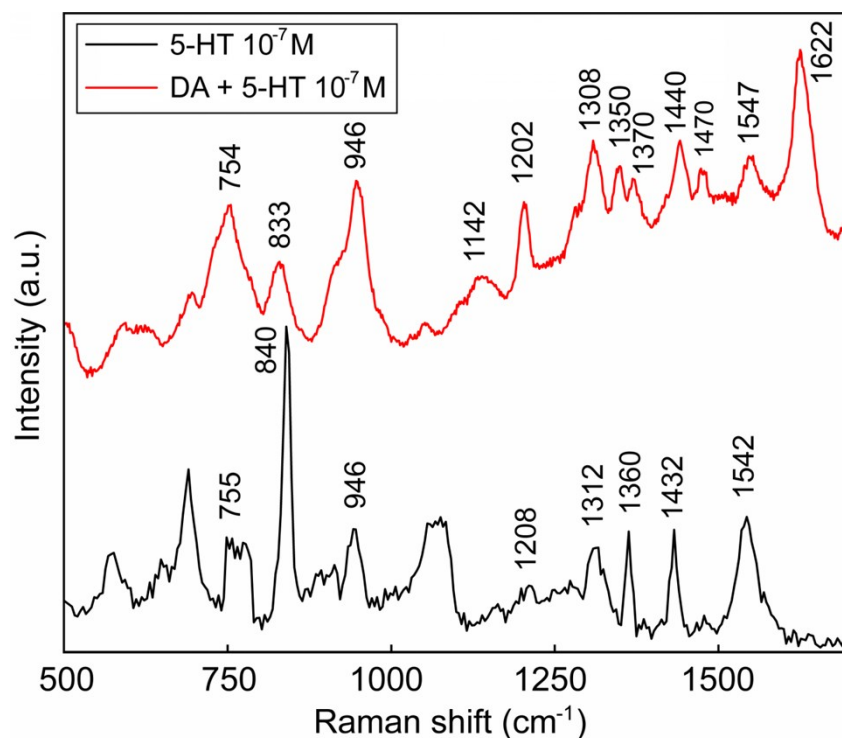

**Figure 1S.** Raman spectra of 5-HT ( $10^{-7}$  M) and the mixture of 5-HT and dopamine in the presence of ascorbic acid.

In comparison with other reports, 5-HT detected by our Au NPs has some advantages. First, the lowest 5-HT's concentration could be detected by our Au NPs was 1000 times lower than the polycrystalline silver electrode prepared by Song et al..<sup>75</sup> The peaks of 5-HT spectra was clearer and sharper than the substrate from graphene-Au nanopyramid heterostructure fabricated by Wang et al..<sup>82</sup> Moreover, the spectra of 5-HT detected by our substrate was more reproducible than the Ag colloids synthesized by Qiu et al..<sup>83</sup> Our substrate was facilely fabricated and high efficient in 5-HT detection with the selective mechanism of Au NPs to amine group of 5-HT.

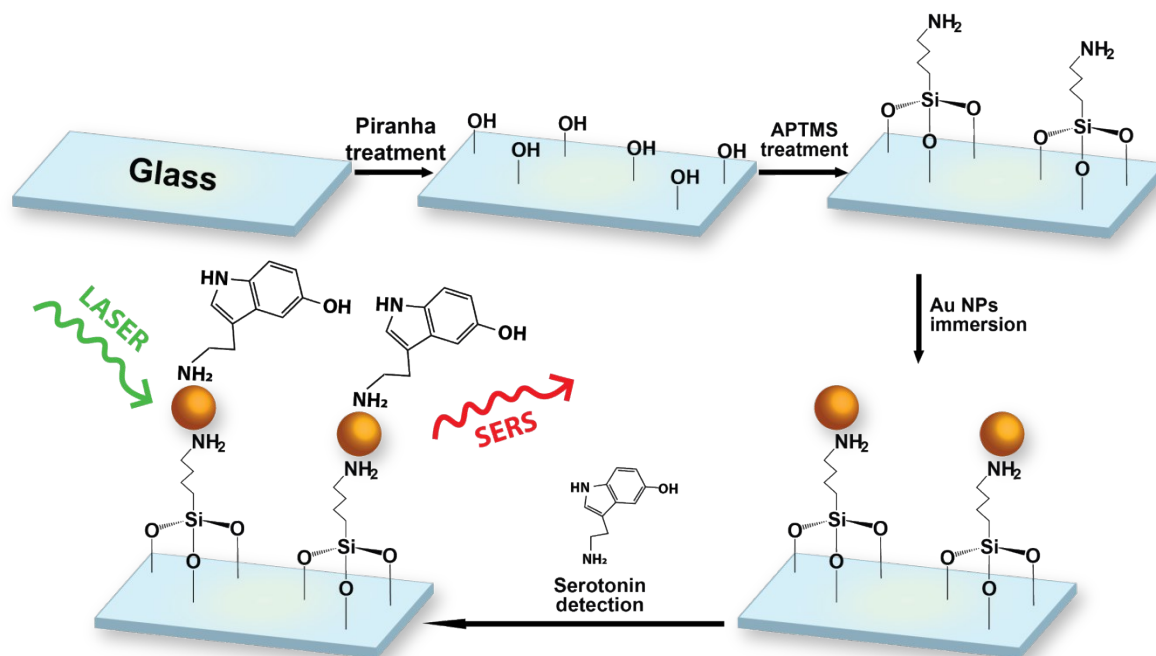

**Fig. 2S.** Schematic diagram of 5-HT molecules linking with the Au NPs modified on glass substrate.

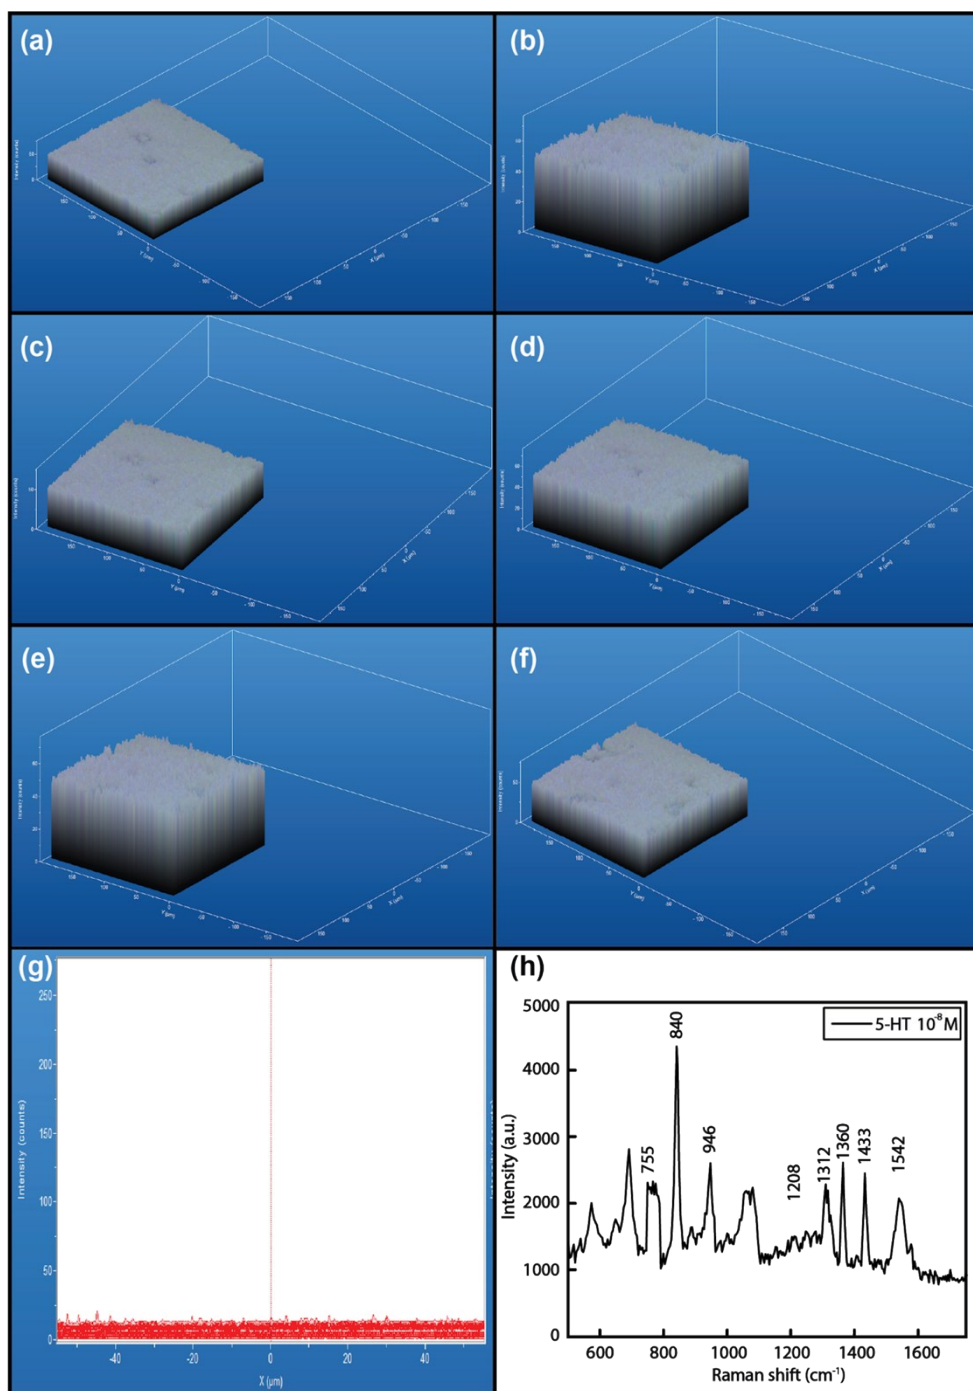

**Fig. 3S.** Raman mapping of 5-HT ( $10^{-8}$  M) adsorbed on our substrate.

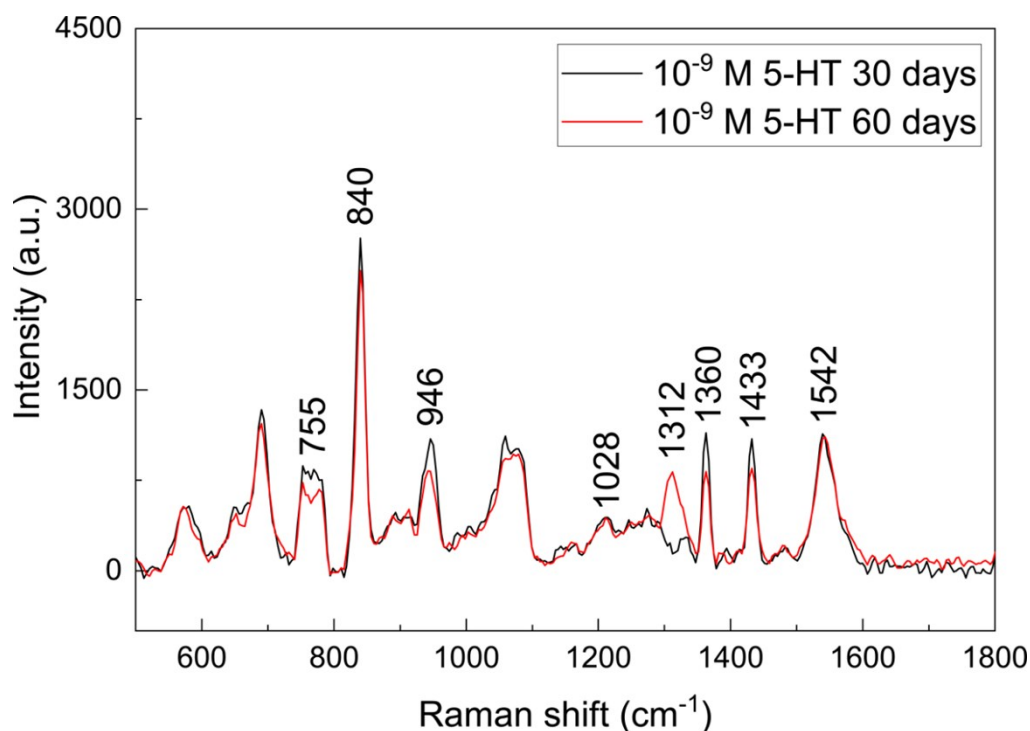

**Fig. 4S.** Raman spectra of 5-HT at the concentration of  $10^{-9}$  M on Au NPs coated substrate in 30 and 60 days.

#### References:

- 75 P. Song, X. Guo, Y. Pan, Y. Wen, Z. Zhang and H. Yang, *J. Electroanal. Chem*, 2013, **688**, 384-391.
- 80 F. S. Manciu, M. Manciu, J. D. Ciubuc, E. M. Sundin, K. Ochoa, M. Eastman, W. G. Durrer, J. Guerrero, B. Lopez, M. Subedi and K. E. Bennet, *Biosensors*, 2019, 9, 3.
- 81 E. Vander Ende, M. R. Bourgeois, A. I. Henry, J. L. Chavez, R. Krabacher, G. C. Schatz and R. P. Van Duyne, *Analytical chemistry*, 2019, **91**, 9554-9562.
- 82 P. Wang, M. Xia, O. Liang, K. Sun, A. F. Cipriano, T. Schroeder, H. Liu and Y. Xie, *Anal. Chem.*, 2015, **87**, 10255-10261.
- 83 C. Qiu, K. E. Bennet, J. R. Tomshine, S. Hara, J. D. Ciubuc, U. Schmidt, W. G. Durrer, M. B. McIntosh, M. Eastman and F. S. Manciu, *Biointerface Res. Appl. Chem.*, 2017, **7**, 1921-1926.
